# Supplementary material for: Adaptive digital tissue deconvolution
Source: PubMed Central journal article supplement (PMC11256946; doi:10.1093/bioinformatics/btae263), 2024-06-28
Supplement: btae263_supplementary_data.pdf [file btae263_supplementary_data.pdf]

# Supplementary Material: Adaptive Digital Tissue Deconvolution

## 1 Algorithmic details

### 1.1 Estimate hidden cell proportions

The hidden cell proportions  $c = (c_1, c_2, \dots, c_n) \in \mathbb{R}_+^{1 \times n}$  of ADTD can be estimated analogously to Eq. (7) of the main manuscript as follows:

$$\begin{aligned}
 Y_{\cdot,i} &= \Delta X C_{\cdot,i} + x c_i + \epsilon_{\cdot,i} \\
 \Rightarrow 1 &= \sum_{j=1}^p Y_{ji} = \sum_{j=1}^p \sum_{k=1}^q \Delta_{jk} X_{jk} C_{ki} + \sum_{j=1}^p x_j c_i + \epsilon_i \\
 \Rightarrow c_i &= 1 - \sum_{j=1}^p \sum_{k=1}^q \Delta_{jk} X_{jk} C_{ki} \\
 \Rightarrow c &= \max((0, \dots, 0), J_{1,n} - J_{1,p}(\Delta \circ X)C), \tag{1}
 \end{aligned}$$

where we used  $\sum_{j=1}^p x_j = 1$  and assumed that the  $\epsilon_i$  are small.

### 1.2 Optimization with respect to $C$

Next, we derive an estimate for  $C$ . Consider the ADTD loss function  $L_{\text{ADTD}}(C, x, \Delta)$  for given  $x$  and  $\Delta$ :

$$\begin{aligned}
 F(C) &= L_{\text{ADTD}}(C, x, \Delta) \\
 &= \|G(Y - (\Delta \circ X)C - x(J_{1,n} - J_{1,p}(\Delta \circ X)C))\|_F^2 + \lambda_1 \|C_0 - C\|_F^2 + \text{const.} \\
 &= \|GY - GxJ_{1,n} - G(\Delta \circ X - xJ_{1,p}(\Delta \circ X))C\|_F^2 + \lambda_1 \|C_0 - C\|_F^2 + \text{const.} \\
 &= \left\| \begin{pmatrix} GY - GxJ_{1,n} \\ \sqrt{\lambda_1}C_0 \end{pmatrix} - \begin{pmatrix} G(\Delta \circ X - xJ_{1,p}(\Delta \circ X)) \\ \sqrt{\lambda_1}I_q \end{pmatrix} C \right\|_F^2 + \text{const.} \tag{2}
 \end{aligned}$$

The latter expression allows us to reformulate the estimate of  $C$  as a quadratic programming problem. Let  $\mathbf{c} = C_{\cdot,i}$  and  $y = Y_{\cdot,i}$ , then estimating  $C$  can be achieved by minimizing

$$\frac{1}{2} \mathbf{c}^T P \mathbf{c} + q^T \mathbf{c} \tag{3}$$

subject to

$$J_{1,p}(\Delta \circ X)\mathbf{c} \leq (1, \dots, 1)$$

and

$$-\mathbf{c} \preceq 0.$$

with respect to  $\mathbf{c}$ , where

$$P = 2 \begin{pmatrix} G(\Delta \circ X - xJ_{1,p}(\Delta \circ X)) \\ \sqrt{\lambda_1}I_q \end{pmatrix}^T \begin{pmatrix} G(\Delta \circ X - xJ_{1,p}(\Delta \circ X)) \\ \sqrt{\lambda_1}I_q \end{pmatrix},$$

$$Q^T = -2 \begin{pmatrix} GY - GxJ_{1,n} \\ \sqrt{\lambda_1}C_0 \end{pmatrix}^T \begin{pmatrix} G(\Delta \circ X - xJ_{1,p}(\Delta \circ X)) \\ \sqrt{\lambda_1}I_q \end{pmatrix}$$

and

$$q = Q_{\cdot i}.$$

This procedure is performed for all columns  $C_i$ .

### 1.3 Optimization with respect to $x$

Finally, we derive an estimate for  $x$ , where we use the abbreviation  $Z = Y - \Delta XC$ :

$$\begin{aligned} L_{\text{ADTD}}(x) &= \|GZ - Gxc\|_F^2 \\ &= \text{Tr}[(Z - xc)^T \Gamma (Z - xc)] \\ &= \text{Tr}[c^T x^T \Gamma xc] - 2 \text{Tr}[Z^T \Gamma xc] \\ &= \text{Tr}[cc^T x^T \Gamma x] - 2 \text{Tr}[cZ^T \Gamma x] \\ &= (cc^T)(x^T \Gamma x) - 2cZ^T \Gamma x \\ &= \frac{1}{2}x^T P' x + q'^T x \end{aligned}$$

subject to  $x \succeq 0$  and  $\sum_{j=1}^p x_j = 1$ , with  $P' = 2(cc^T)\Gamma$  and  $q'^T = -2cZ^T\Gamma$ , where one should note that  $cc^T$  and  $x^T\Gamma x$  are scalars. Thus, also this optimization problem reduces to quadratic programming.

### 1.4 Optimization with respect to $\Delta$

In the following, we derive a procedure to minimize  $L_{\text{ADTD}}(C, x, \Delta)$  with respect to  $\Delta_{j,\cdot}$ , while  $C$ ,  $x$  and  $\Delta_{k,\cdot}$  with  $k \neq j$  are kept fixed. Let,  $\delta_k = (0, \dots, 0, 1, 0, \dots, 0)^T$ , where the 1 is at the  $k$ th position and let  $\delta_{\neq k} = (1, \dots, 1)^T -$

$\delta_k$ . Consider  $F(\Delta_{j,\cdot}) = L_{\text{ADTD}}(C, x, \Delta)$ . Then  $F(\Delta_{j,\cdot})$  becomes

$$\begin{aligned}
& \|G(Y - xJ_{1,n} - (\Delta \circ X)C + xJ_{1,p}(\Delta \circ X)C)\|_F^2 + \lambda_2 \|\Delta - J_{p,q}\|_F^2 \\
= & \|G_{jj}(Y_{j,\cdot} - x_j J_{1,n} + x_j \delta_{\neq j}^T (\Delta \circ X)C - (\Delta \circ X)_{j,\cdot} C + x_j \delta_j^T (\Delta \circ X)C)\|_F^2 \\
& + \sum_{k \neq j} \|G_{kk}(Y_{k,\cdot} - x_k J_{1,n} - (\Delta \circ X)_{k,\cdot} C + x_k \delta_{\neq j} (\Delta \circ X)C + x_k \delta_j (\Delta \circ X)C)\|_F^2 \\
& + \lambda_2 \|\Delta_{j,\cdot} - J_{1,q}\|_F^2 + \text{const.} \\
= & \|G_{jj}(A_{j,\cdot} - (1 - x_j)(\Delta \circ X)_{j,\cdot} C)\|_F^2 + \sum_{k \neq j} \|G_{kk}(B_{k,\cdot} + x_k \Delta_{j,\cdot} (\Delta \circ X)_{k,\cdot} C)\|_F^2 \\
& + \lambda_2 \|\Delta_{j,\cdot} - J_{1,q}\|_F^2 + \text{const.} \\
= & \|G_{jj}(A_{j,\cdot} - (1 - x_j)\Delta_{j,\cdot} C_{X_{j,\cdot}})\|_F^2 + \sum_{k \neq j} \|G_{kk}(B_{k,\cdot} + x_k \Delta_{j,\cdot} C_{X_{j,\cdot}})\|_F^2 \\
& + \lambda_2 \|\Delta_{j,\cdot} - J_{1,q}\|_F^2 + \text{const.},
\end{aligned}$$

with

$$\begin{aligned}
A_{j,\cdot} &= Y_{j,\cdot} - x_j J_{1,n} + x_j \delta_{\neq j}^T (\Delta \circ X)C, \\
B_{k,\cdot} &= Y_{k,\cdot} - x_k J_{1,n} - (\Delta \circ X)_{k,\cdot} C + x_k \delta_{\neq j} (\Delta \circ X)C, \quad (4)
\end{aligned}$$

where we used the abbreviation  $C_{X_{j,\cdot}} = (X_{j,\cdot}^T \circ C_{\cdot,1}, \dots, X_{j,\cdot}^T \circ C_{\cdot,n})$  and summarized all terms independent of  $\Delta_{j,\cdot}$  as *const.*. To minimize the former equation using quadratic programming, we rewrite it as

$$\begin{aligned}
F(\Delta_{j,\cdot}) &= G_{jj}^2 (A_{j,\cdot} A_{j,\cdot}^T - 2(1 - x_j) A_{j,\cdot} C_{X_{j,\cdot}}^T \Delta_{j,\cdot}^T + (1 - x_j)^2 \Delta_{j,\cdot} C_{X_{j,\cdot}} C_{X_{j,\cdot}}^T \Delta_{j,\cdot}^T) \\
&+ \sum_{k \neq j} G_{kk}^2 (B_{k,\cdot} B_{k,\cdot}^T + 2x_k B_{k,\cdot} C_{X_{j,\cdot}}^T \Delta_{j,\cdot}^T + x_k^2 \Delta_{j,\cdot} C_{X_{j,\cdot}} C_{X_{j,\cdot}}^T \Delta_{j,\cdot}^T) \\
&+ \lambda_2 (J_{1,q} J_{1,q}^T - 2J_{1,q} \Delta_{j,\cdot}^T + \Delta_{j,\cdot} \Delta_{j,\cdot}^T). \quad (5)
\end{aligned}$$

Let  $\mathbf{b} = \Delta_{j,\cdot}^T$ ,

$$P = 2 \left( G_{jj}^2 (1 - x_j)^2 + \sum_{k \neq j} G_{kk}^2 x_k^2 \right) C_{X_{j,\cdot}} C_{X_{j,\cdot}}^T + 2\lambda_2 I_q$$

and

$$q^T = -2 \left( G_{jj}^2 (1 - x_j) A_{j,\cdot} - \sum_{k \neq j} G_{kk}^2 x_k B_{k,\cdot} \right) C_{X_{j,\cdot}}^T - 2\lambda_2 J_{1,q},$$

to formulate a typical quadratic programming problem:

$$F(\mathbf{b}) = \frac{1}{2} \mathbf{b}^T P \mathbf{b} + q^T \mathbf{b} \quad (6)$$

subject to constraints

$$\mathbf{b} \succeq (0, \dots, 0)^T, \quad \text{and} \quad J_{1,n} - \delta_{\neq k}^T(\Delta \circ X)C \succeq \mathbf{b}^T C_{X_k}. \quad (7)$$

The latter constraint can be derived from ADTD constraint  $J_{1,q}(\Delta \circ X)C \preceq J_{1,n}$ .

## 2 Supplementary Figures and Tables

Table S1: **Performance of ADTD, EPIC, CIBERSORTx and Scaden on training data.** Observed Pearson’s correlations obtained by comparing the estimated cellular proportions with the ground truth for artificial cellular training mixtures generated from single-cell data of healthy breast tissue specimens (see Methods). The errors correspond to  $\pm 1$  standard deviation obtained over 10 simulation runs. For ADTD the parameters  $\lambda_1 = 10^{-1}$  and  $\lambda_2 = 10^{-8}$  were used (see hyper-parameter selection in validation performance section). Abbreviations: Endo. = endothelial cells; Myel. = myeloid cells; Epith. = epithelial cells; PVL = perivascular-like cells

|         | ADTD                                | EPIC <sub>1</sub>                   | EPIC <sub>2</sub> |
|---------|-------------------------------------|-------------------------------------|-------------------|
| B-cells | 0.791 $\pm$ 0.020                   | 0.112 $\pm$ 0.031                   | 0.648 $\pm$ 0.014 |
| Endo.   | <b>0.941 <math>\pm</math> 0.006</b> | <b>0.863 <math>\pm</math> 0.005</b> | 0.672 $\pm$ 0.015 |
| Myel.   | <b>0.943 <math>\pm</math> 0.005</b> | <b>0.854 <math>\pm</math> 0.007</b> | 0.687 $\pm$ 0.015 |
| Epith.  | <b>0.888 <math>\pm</math> 0.008</b> | 0.647 $\pm$ 0.014                   | -                 |
| PVL     | <b>0.894 <math>\pm</math> 0.011</b> | 0.573 $\pm$ 0.019                   | -                 |
| T-cells | <b>0.942 <math>\pm</math> 0.003</b> | <b>0.813 <math>\pm</math> 0.009</b> | 0.293 $\pm$ 0.02  |
| mean    | <b>0.900 <math>\pm</math> 0.003</b> | 0.644 $\pm$ 0.007                   | 0.577 $\pm$ 0.008 |
|         | CIBERSORTx                          | Scaden                              |                   |
| B-cells | 0.179 $\pm$ 0.041                   | 0.486 $\pm$ 0.025                   |                   |
| Endo.   | <b>0.825 <math>\pm</math> 0.007</b> | 0.782 $\pm$ 0.012                   |                   |
| Myel.   | <b>0.87 <math>\pm</math> 0.006</b>  | <b>0.812 <math>\pm</math> 0.015</b> |                   |
| Epith.  | <b>0.806 <math>\pm</math> 0.008</b> | 0.783 $\pm$ 0.008                   |                   |
| PVL     | 0.707 $\pm$ 0.012                   | 0.756 $\pm$ 0.01                    |                   |
| T-cells | <b>0.826 <math>\pm</math> 0.009</b> | 0.715 $\pm$ 0.016                   |                   |
| mean    | 0.702 $\pm$ 0.006                   | 0.722 $\pm$ 0.006                   |                   |

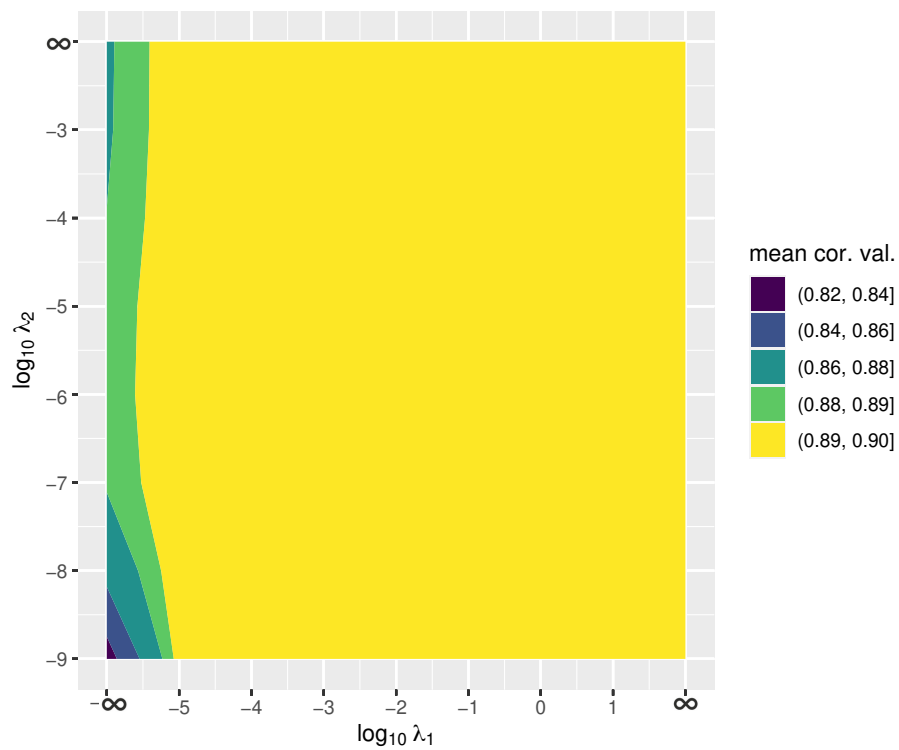

Figure S1: **ADTD performance for different hyper parameters on the training data.** A comprehensive parameter grid consisting of all combinations of  $\lambda_1 \in \{0, 10^{-5}, 10^{-4}, \dots, 1, 10, \infty\}$  with  $\lambda_2 \in \{10^{-9}, 10^{-8}, \dots, 10, \infty\}$  was evaluated. Performance was assessed by (1) calculating Pearson's correlation between ground truth and predictions for each of the included cell types, and (2) by subsequently averaging them.

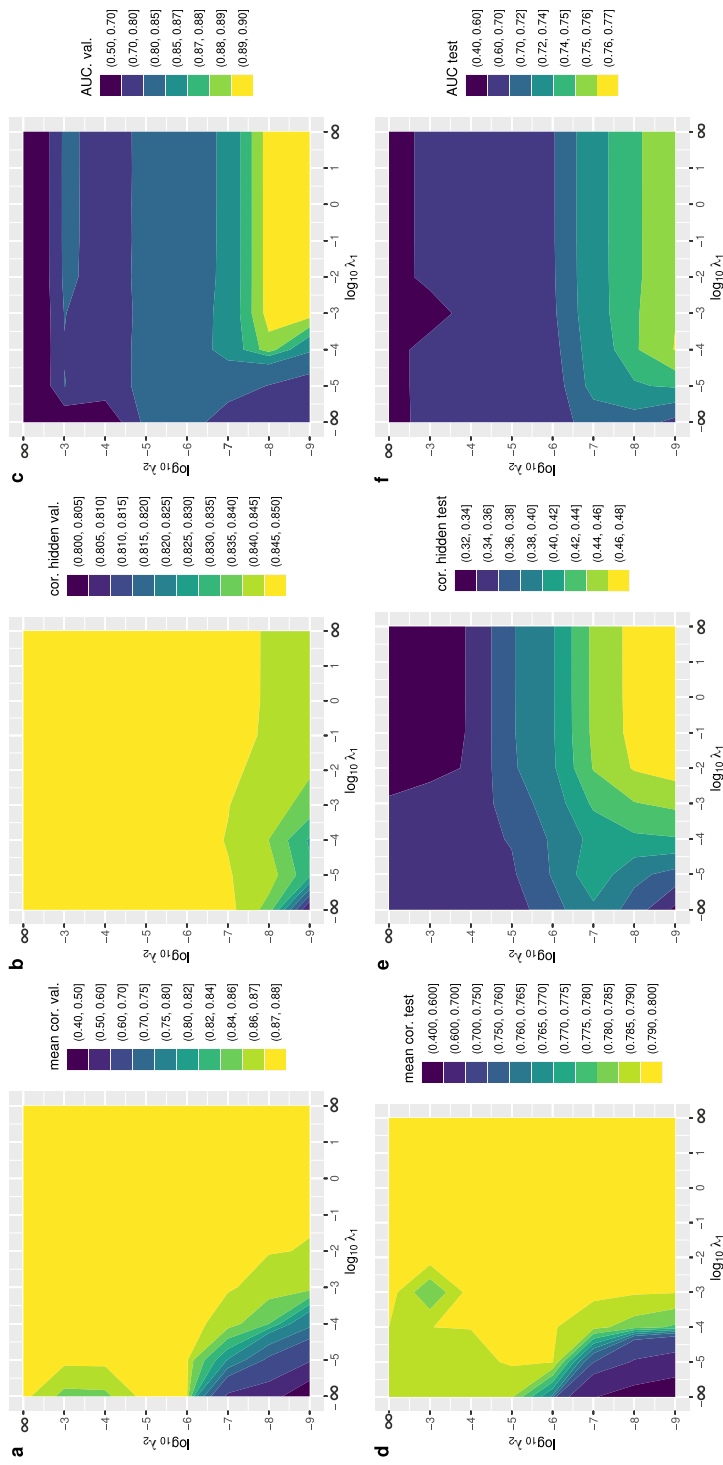

Figure S2: ADTD performance for different hyper parameters on the validation and test data data. A comprehensive parameter grid consisting of all combinations of  $\lambda_1 \in \{0, 10^{-5}, 10^{-4}, \dots, 1, 10, \infty\}$  with  $\lambda_2 \in \{10^{-9}, 10^{-8}, \dots, 10, \infty\}$  was evaluated. Figure a to c correspond to the validation data and d to e to the test data. Figure a and d show the average performance in predicting the known cellular contributions, and b and e for the hidden contributions. Fig. c and f give the corresponding areas under the ROC curves for detecting cell-type specific gene regulation.

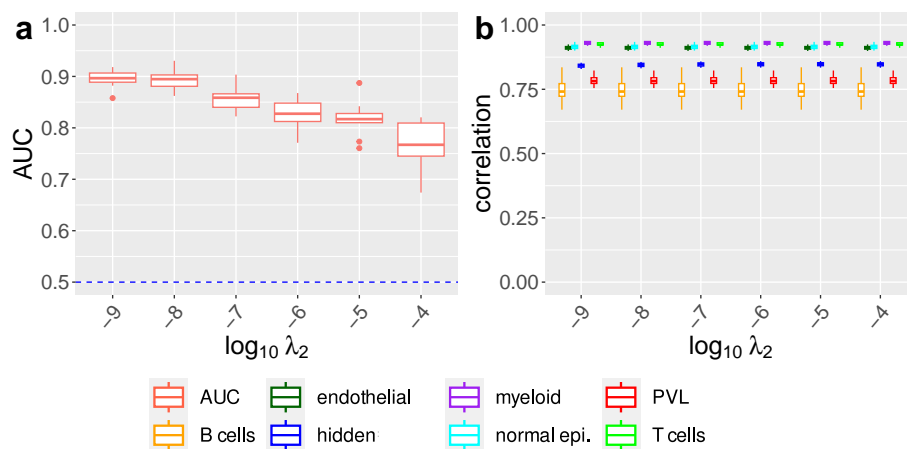

Figure S3: **ADTD performance for recovering cell-type specific gene regulation on the validation data.** The left figure shows areas under the ROC curve for recovering cellular regulation for different regularization parameters  $\lambda_2$ , where  $\lambda_1 = 10^{-1}$  was kept fixed. The corresponding performance in terms of Pearson's correlation for ADTD for estimating the known and hidden cellular contributions is shown on the right. Abbreviation: “hidden” = hidden cellular contributions.

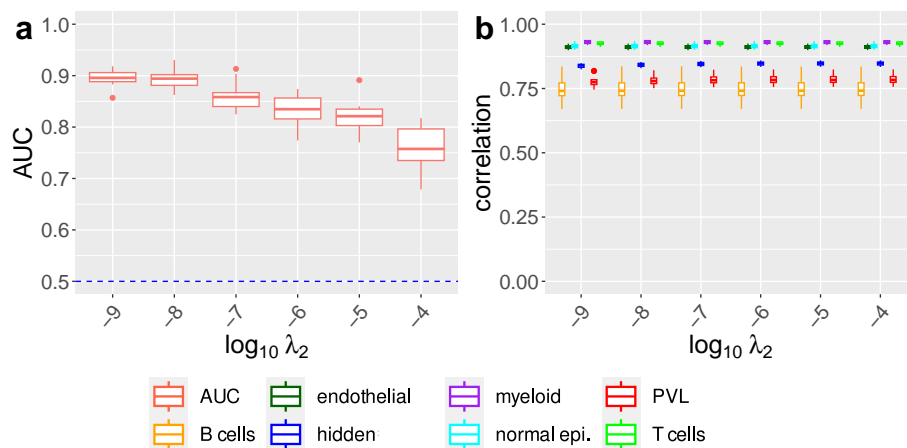

Figure S4: **ADTD performance for recovering cell-type specific gene regulation on the validation data.** The left figure shows areas under the ROC curve for recovering cellular regulation for different regularization parameters  $\lambda_2$ , where  $\lambda_1 = 10^{-3}$  was kept fixed. The corresponding performance in terms of Pearson's correlation for ADTD for estimating the known and hidden cellular contributions is shown on the right. Abbreviation: “hidden” = hidden cellular contributions.



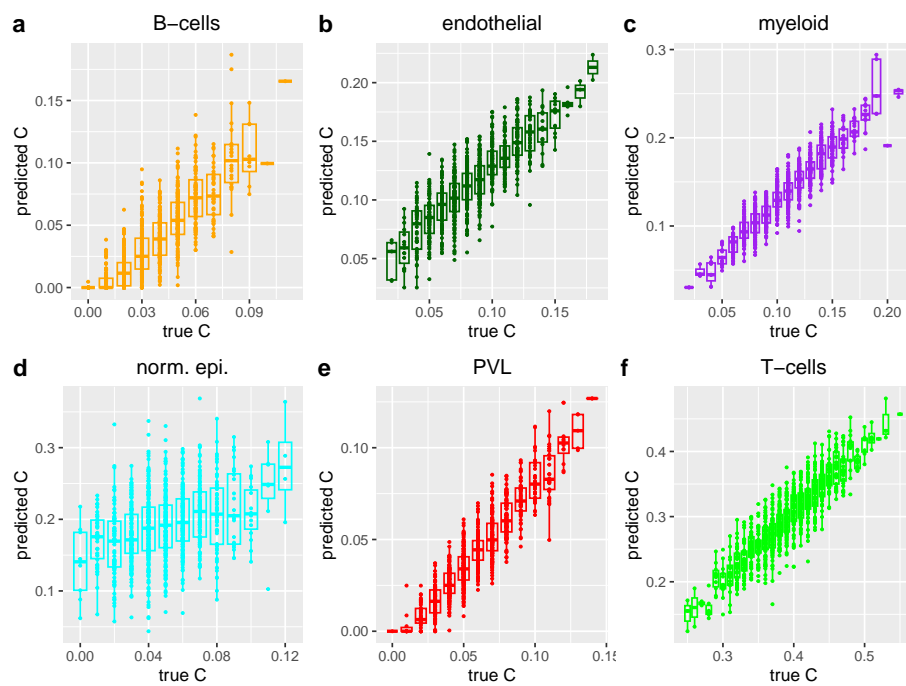

Figure S5: **Visualization of ADTD results on test data.** Predicted versus true cellular composition for the cell types captured in the reference matrix  $X$  for one simulation run of the testing scenario ( $n = 1000$ ).

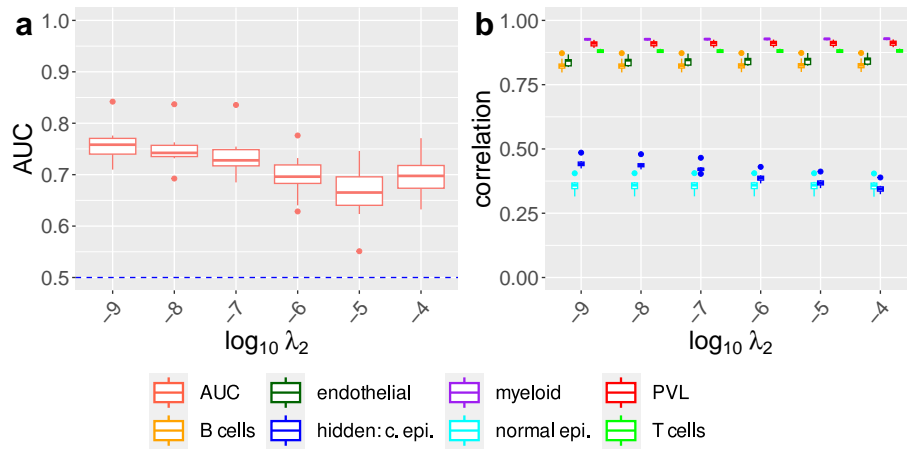

Figure S6: **ADTD performance for recovering cell-type specific gene regulation on the breast cancer test data.** The left figure shows areas under the ROC curve for recovering cellular regulation for different regularization parameters  $\lambda_2$ , where  $\lambda_1 = 10^{-3}$  was kept fixed. The corresponding performance in terms of Pearson's correlation for ADTD for estimating the known and hidden cellular contributions is shown on the right. Abbreviation: “hidden: c. epi.” = hidden cancer epithelial cells.

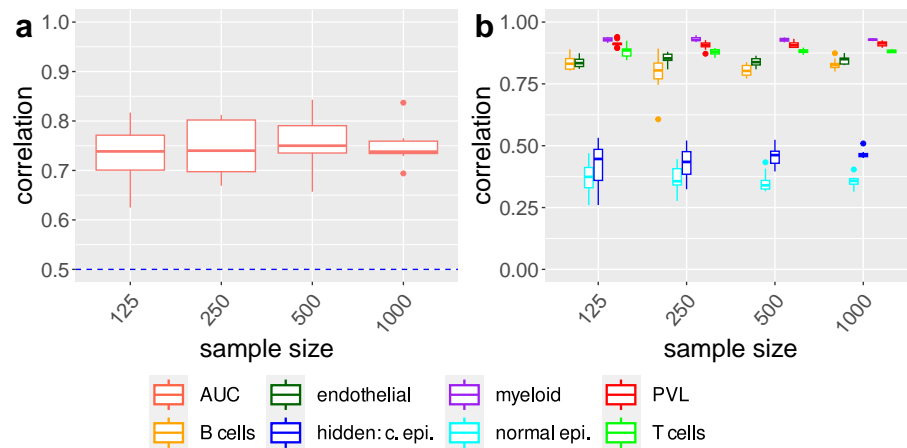

Figure S7: **ADTD performance versus sample size in the breast cancer test data.** Figure a shows areas under the ROC curve for recovering cellular regulation for different sample sizes  $n = 125, 250, 500, 1000$  for ADTD ( $\lambda_1 = 10^{-1}, \lambda_2 = 10^{-8}$ ). The corresponding performance in terms of Pearson's correlation for estimating the known and hidden cellular contributions is shown on the right. Abbreviation: “hidden: c. epi.” = hidden cancer epithelial cells.

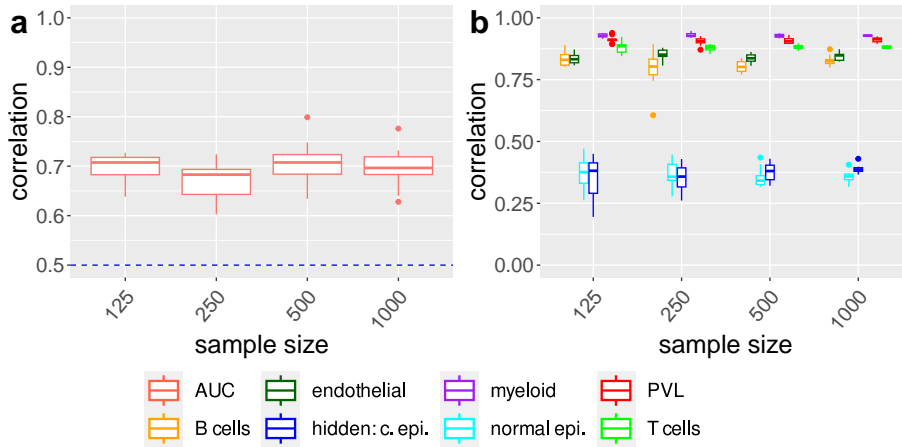

Figure S8: **ADTD performance versus sample size in the breast cancer test data.** Figure a shows areas under the ROC curve for recovering cellular regulation for different sample sizes  $n = 125, 250, 500, 1000$  for ADTD ( $\lambda_1 = 10^{-3}, \lambda_2 = 10^{-6}$ ). The corresponding performance in terms of Pearson's correlation for estimating the known and hidden cellular contributions is shown on the right. Abbreviation: "hidden: c. epi." = hidden cancer epithelial cells.

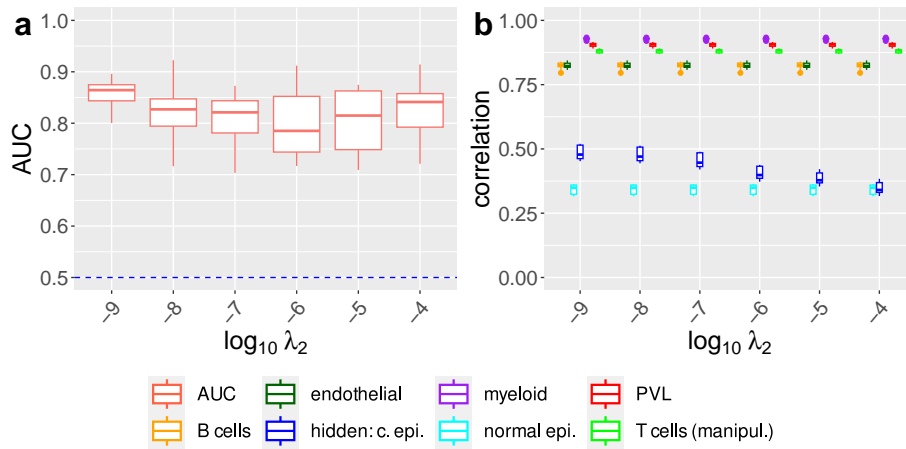

Figure S9: **ADTD performance for recovering cell-type specific gene regulation in T-cells on the breast cancer test data.** The left figure shows areas under the ROC curve for recovering cellular regulation in T cells for different regularization parameters  $\lambda_2$ , where  $\lambda_1 = 10^{-1}$  was kept fixed. The corresponding performance in terms of Pearson's correlation for ADTD for estimating the known and hidden cellular contributions is shown on the right. Abbreviation: "hidden: c. epi." = hidden cancer epithelial cells.

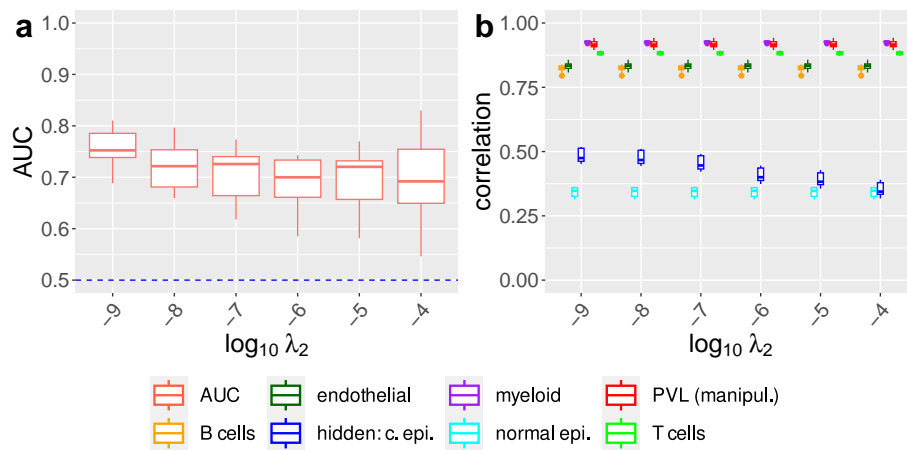

Figure S10: **ADTD performance for recovering cell-type specific gene regulation in PVL cells on the breast cancer test data.** The left figure shows areas under the ROC curve for recovering cellular regulation in PVL cells for different regularization parameters  $\lambda_2$ , where  $\lambda_1 = 10^{-1}$  was kept fixed. The corresponding performance in terms of Pearson's correlation for ADTD for estimating the known and hidden cellular contributions is shown on the right. Abbreviation: "hidden: c. epi." = hidden cancer epithelial cells

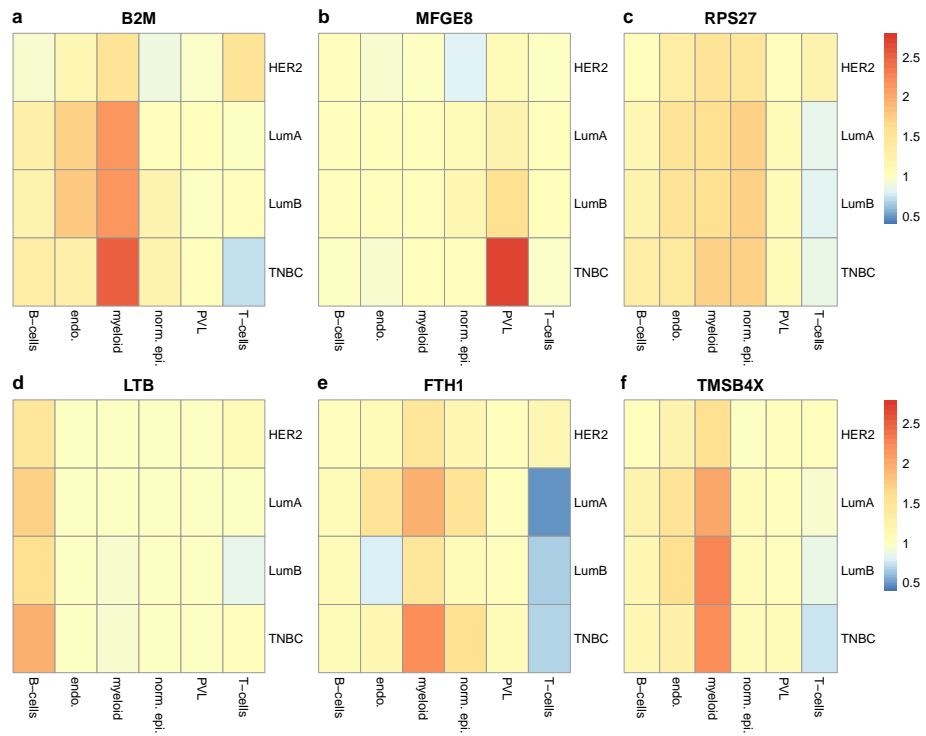

Figure S11:  $\Delta$  matrices representing cell-type specific gene regulation for six different genes discussed in the main text. Upregulation corresponds to red and downregulation to blue colors.
